# Supplementary material for: Multi-tissue transcriptomes of caecilian amphibians highlight incomplete knowledge of vertebrate gene families
Source: PubMed Central journal article supplement — DNA Res. 2018 Oct 22;26(1):13–20. doi: 10.1093/dnares/dsy034 (PMC6379020; doi:10.1093/dnares/dsy034), 2018-10-22
Supplement: dsy034_supplementary_data.pdf [file dsy034_supplementary_data.pdf]

# SUPPLEMENTARY DATA

## **Multi-tissue transcriptomes of caecilian amphibians highlight incomplete knowledge of vertebrate gene families**

María Torres-Sánchez, Christopher J. Creevey, Etienne Kornobis, David J. Gower, Mark Wilkinson, Diego San Mauro\*

\* Author for correspondence ([dsanmaur@ucm.es](mailto:dsanmaur@ucm.es))

### **This PDF file includes:**

Supplementary Tables S1, S2, S3, S4, and S5

Supplementary Figures S1 and S2

**Supplementary Table S1.** Sample information and quality of RNA extractions for each transcriptome sequenced. Precise sampling locations in French Guiana are unavailable because specimens from different localities were maintained together in captivity.

| Species                                                | Specimen voucher | Sampling location                      | Sex          | Tissue         | SRA database number | RIN value | Number of reads |
|--------------------------------------------------------|------------------|----------------------------------------|--------------|----------------|---------------------|-----------|-----------------|
| <i>Caecilia tentaculata</i><br>(Caeciliidae)           | MW 10281         | Kaw Mountains or Nourague              | Male         | Spleen         | SRR5591446          | 9.9       | 49757992        |
|                                                        |                  |                                        |              | Foregut        | SRR5591452          | 8.8       | 54057168        |
|                                                        |                  |                                        |              | Heart          | SRR5591451          | 9.8       | 56478032        |
|                                                        |                  |                                        |              | Kidney         | SRR5591454          | 9.6       | 51051562        |
|                                                        |                  |                                        |              | Liver          | SRR5591453          | 9.1       | 57568844        |
|                                                        |                  |                                        |              | Muscle         | SRR5591447          | 9.5       | 58911078        |
|                                                        |                  |                                        |              | Posterior Skin | SRR5591450          | 8.7       | 43278838        |
|                                                        |                  |                                        |              | Skin           | SRR5591449          | 10        | 40889140        |
|                                                        |                  |                                        |              | Testis         | SRR5591445          | 9.5       | 56700716        |
| <i>Microcaecilia dermatophaga</i><br>(Siphonopidae)    | MW 10280         | Angouleme or St Laurent                | ? (juvenile) | Kidney         | SRR5591430          | 9.5       | 42750256        |
|                                                        |                  |                                        |              | Liver          | SRR5591429          | 9.3       | 56029426        |
|                                                        |                  |                                        |              | Posterior Skin | SRR5591428          | 9.2       | 39517710        |
|                                                        |                  |                                        |              | Skin           | SRR5591427          | 9.6       | 43291236        |
| <i>Microcaecilia unicolor</i><br>(Siphonopidae)        | MW 3338          | Kaw Mountains or Nourague              | Female       | Kidney         | SRR5591439          | 8.9       | 52616356        |
|                                                        |                  |                                        |              | Liver          | SRR5591440          | 8.2       | 58062338        |
|                                                        |                  |                                        |              | Skin           | SRR5591437          | 7.8       | 32957690        |
|                                                        | MW 10282         | Kaw Mountains or Nourague              | Female       | Foregut        | SRR5591426          | 9.6       | 47417282        |
|                                                        |                  |                                        |              | Liver          | SRR5591425          | 8.9       | 55237106        |
|                                                        |                  |                                        |              | Muscle         | SRR5591423          | 8.6       | 53570730        |
|                                                        |                  |                                        |              | Posterior Skin | SRR5591422          | 8.2       | 49216256        |
|                                                        |                  |                                        |              | Skin           | SRR5591421          | 8.9       | 40774934        |
|                                                        |                  |                                        |              | Lung           | SRR5591424          | 8.9       | 48841504        |
| <i>Rhinatrema bivittatum</i><br>(Rhinatreumatidae)     | MW 3339          | Kaw Mountains or Nourague or Angouleme | Male         | Kidney         | SRR5591443          | 9.2       | 48775398        |
|                                                        |                  |                                        |              | Liver          | SRR5591420          | 8.8       | 51635654        |
|                                                        |                  |                                        |              | Skin           | SRR5591419          | 9.7       | 39705618        |
|                                                        |                  |                                        |              | Testis         | SRR5591432          | 8.9       | 53962268        |
|                                                        | MW 10279         | Kaw Mountains or Nourague or Angouleme | Female       | Spleen         | SRR5591442          | 10        | 56676152        |
|                                                        |                  |                                        |              | Foregut        | SRR5591438          | 8.6       | 47607116        |
|                                                        |                  |                                        |              | Liver          | SRR5591435          | 8.8       | 47561092        |
|                                                        |                  |                                        |              | Muscle         | SRR5591433          | 9.4       | 52900438        |
|                                                        |                  |                                        |              | Skin           | SRR5591434          | 8.3       | 39106530        |
| Lung                                                   | SRR5591436       | 9.1                                    | 51182452     |                |                     |           |                 |
| <i>Typhlonectes compressicauda</i><br>(Typhlonectidae) | MW 10283         | Matoury or St George                   | Male         | Foregut        | SRR5591431          | 9.8       | 53680574        |
|                                                        |                  |                                        |              | Heart          | SRR5591416          | 9.4       | 53159450        |
|                                                        |                  |                                        |              | Kidney         | SRR5591415          | 9.3       | 45034380        |
|                                                        |                  |                                        |              | Liver          | SRR5591418          | 9.8       | 51838608        |
|                                                        |                  |                                        |              | Posterior Skin | SRR5591444          | 10        | 54023400        |
|                                                        |                  |                                        |              | Skin           | SRR5591441          | 9.9       | 36051312        |
| Lung                                                   | SRR5591417       | 8.7                                    | 44973848     |                |                     |           |                 |

MW, field tag of specimen deposited at The Natural History Museum, London (UK).

**Supplementary Table S2.** Metrics of the species-specific transcriptomes. Candidate protein-coding genes or contigs with open reading frames (ORFs) found in each caecilian species-specific transcriptome are shown. The alignment percentage represents the amount of pair-end reads that correctly align to each species-specific transcriptome. For the contigs with ORFs, their number (Unique ORFs) and their total number considering all isoforms and post-transcriptional modifications (ORFs' isoforms, note that transcriptomes are built from different tissues) are displayed.

| Species                            | Contigs | N50  | Median contig length | Mean contig length | Alignment percentage | ORFs' isoforms | Unique ORFs |
|------------------------------------|---------|------|----------------------|--------------------|----------------------|----------------|-------------|
| <i>Caecilia tentaculata</i>        | 142,502 | 1884 | 429                  | 932.82             | 96.01                | 63,540         | 27,384      |
| <i>Microcaecilia dermatophaga</i>  | 106,298 | 1784 | 426                  | 903.73             | 97.78                | 42,510         | 22,058      |
| <i>Microcaecilia unicolor</i>      | 146,348 | 1587 | 355                  | 850.91             | 96.93                | 59,355         | 26,302      |
| <i>Rhinatrema bivittatum</i>       | 201,584 | 1713 | 398                  | 857.76             | 96.33                | 83,643         | 34,654      |
| <i>Typhlonectes compressicauda</i> | 134,394 | 1263 | 357                  | 713.87             | 96.25                | 59,151         | 27,603      |

**Supplementary Table S3.** Detection of protein-protein interactions (PPIs) and functional enrichment paths in the tissue-specific known vertebrate gene families. The nodes represent proteins and the edges represent PPIs. PPI enrichment p-value is obtained from the STRING enrichment test that compares the obtained number of edges against an expected number of interactions.

|                                |                           | Foregut                  | Kidney                                                                                                                                                                                                                                       | Liver                                                                                                                                              | Spleen                                              | Testis   |
|--------------------------------|---------------------------|--------------------------|----------------------------------------------------------------------------------------------------------------------------------------------------------------------------------------------------------------------------------------------|----------------------------------------------------------------------------------------------------------------------------------------------------|-----------------------------------------------------|----------|
| Known vertebrate gene families |                           | 19                       | 21                                                                                                                                                                                                                                           | 18                                                                                                                                                 | 11                                                  | 80       |
| Number of nodes                |                           | 17                       | 20                                                                                                                                                                                                                                           | 11                                                                                                                                                 | 11                                                  | 75       |
| Number of edges                |                           | 5                        | 5                                                                                                                                                                                                                                            | 6                                                                                                                                                  | 3                                                   | 19       |
| PPI enrichment p-value         |                           | 2.76e-06                 | 1.31e-05                                                                                                                                                                                                                                     | 0.00258                                                                                                                                            | 4.75e-05                                            | 4.82e-07 |
| Functional enrichment          | Biological Process GO (#) | GO:0007586-Digestion (8) | GO:0098656 - anion transmembrane transport (6); GO:1903825 - organic acid transmembrane transport (5); GO:0003333 - amino acid transmembrane transport (4); GO:0046942 - carboxylic acid transport (5); GO:0015889 - cobalamin transport (2) | GO:0030193 - regulation of blood coagulation (3); GO:0051918- negative regulation of fibrinolysis (2); GO:0072376 - protein activation cascade (3) | GO:0004252 - serine-type endopeptidase activity (4) | -        |
|                                | KEGG PATHWAY (#)          | -                        | -                                                                                                                                                                                                                                            | -                                                                                                                                                  | 04972 - Pancreatic secretion (3)                    | -        |

**Supplementary Table S4.** Results of the Pfam annotation for the candidate novel caecilian gene families with tissue-specific expression.

| Tissue   | Putative novel caecilian gene families | Annotated novel caecilian gene families | Number of protein family domains | Protein family domain |
|----------|----------------------------------------|-----------------------------------------|----------------------------------|-----------------------|
| Foregut  | 32                                     | 3                                       | 6                                | Dimer Tnp hAT         |
|          |                                        |                                         |                                  | Snapiin Pallidin      |
|          |                                        |                                         |                                  | TMF DNA bd            |
|          |                                        |                                         |                                  | DAP10                 |
|          |                                        |                                         |                                  | Adeno E3 CR2          |
|          |                                        |                                         |                                  | PEARLI-4              |
| Heart    | 12                                     | 2                                       | 4                                | BORCS8                |
|          |                                        |                                         |                                  | ReosigmaC             |
|          |                                        |                                         |                                  | TMEM190               |
|          |                                        |                                         |                                  | TEX29                 |
| Kidney   | 40                                     | 6                                       | 14                               | FISNA                 |
|          |                                        |                                         |                                  | Tropomyosin           |
|          |                                        |                                         |                                  | ATG16                 |
|          |                                        |                                         |                                  | IncA                  |
|          |                                        |                                         |                                  | Apolipoprotein        |
|          |                                        |                                         |                                  | BMFP                  |
|          |                                        |                                         |                                  | Tektin                |
|          |                                        |                                         |                                  | Xh1A                  |
|          |                                        |                                         |                                  | EzrA                  |
|          |                                        |                                         |                                  | SlyX                  |
|          |                                        |                                         |                                  | Cadherin pro          |
|          |                                        |                                         |                                  | IGF                   |
|          |                                        |                                         |                                  | Exo endo phos 2       |
|          |                                        |                                         |                                  | LAP2alpha             |
| Liver    | 44                                     | 6                                       | 7                                | NinD                  |
|          |                                        |                                         |                                  | KRAB                  |
|          |                                        |                                         |                                  | zf-met                |
|          |                                        |                                         |                                  | LAP2alpha             |
|          |                                        |                                         |                                  | adh short             |
|          |                                        |                                         |                                  | CENP-P                |
|          |                                        |                                         |                                  | Transposase 22        |
| Lung     | 9                                      | 1                                       | 1                                | LAP2alpha             |
| Muscle   | 27                                     | 4                                       | 37                               | IncA                  |
|          |                                        |                                         |                                  | ATG16                 |
|          |                                        |                                         |                                  | EMP24 GP25L           |
|          |                                        |                                         |                                  | DUF4600               |
|          |                                        |                                         |                                  | Fib alpha             |
|          |                                        |                                         |                                  | CLZ                   |
|          |                                        |                                         |                                  | FlaC arch             |
|          |                                        |                                         |                                  | BRE1                  |
|          |                                        |                                         |                                  | Xh1A                  |
|          |                                        |                                         |                                  | Nsp1 C                |
|          |                                        |                                         |                                  | Reo sigmaC            |
|          |                                        |                                         |                                  | DUF1664               |
|          |                                        |                                         |                                  | Spc7                  |
|          |                                        |                                         |                                  | ABC tran CTD          |
|          |                                        |                                         |                                  | EzrA                  |
|          |                                        |                                         |                                  | Laminin II            |
|          |                                        |                                         |                                  | Apolipoprotein        |
|          |                                        |                                         |                                  | DUF812                |
|          |                                        |                                         |                                  | CENP-F leu zip        |
|          |                                        |                                         |                                  | YjcZ                  |
| EspB     |                                        |                                         |                                  |                       |
| Muted    |                                        |                                         |                                  |                       |
| KASH CCD |                                        |                                         |                                  |                       |
| Spectrin |                                        |                                         |                                  |                       |

|        |     |    |    |                 |
|--------|-----|----|----|-----------------|
|        |     |    |    | TMF DNA_bd      |
|        |     |    |    | IFT57           |
|        |     |    |    | Prefoldin       |
|        |     |    |    | ADIP            |
|        |     |    |    | ERM             |
|        |     |    |    | Jnk-SapK_ap_N   |
|        |     |    |    | MscS_porin      |
|        |     |    |    | SlyX            |
|        |     |    |    | TOBE_2          |
|        |     |    |    | LAP2alpha       |
|        |     |    |    | DUF3584         |
|        |     |    |    | Kre28           |
| Skin   | 108 | 13 | 20 | Ank_5           |
|        |     |    |    | KIX_2           |
|        |     |    |    | RVT_1           |
|        |     |    |    | LAP2alpha       |
|        |     |    |    | zf-RVT          |
|        |     |    |    | UPAR_LY6        |
|        |     |    |    | Toxin_TOLIP     |
|        |     |    |    | DUF4061         |
|        |     |    |    | DUF724          |
|        |     |    |    | DUF4407         |
|        |     |    |    | OmpH            |
|        |     |    |    | Tup_N           |
|        |     |    |    | PhaP_Bmeg       |
|        |     |    |    | Asp_protease_2  |
|        |     |    |    | gag-asp_proteas |
|        |     |    |    | C1-set          |
|        |     |    |    | DUF4381         |
|        |     |    |    | DUF4630         |
|        |     |    |    | Spectrin        |
| Spleen | 8   | 2  | 3  | Cystatin        |
|        |     |    |    | ATP1G1_PLM_MAT8 |
|        |     |    |    | SQAPI           |
| Testis | 142 | 12 | 14 | Spc7            |
|        |     |    |    | NPV_P10         |
|        |     |    |    | DUF1664         |
|        |     |    |    | Reo_sigmaC      |
|        |     |    |    | CD225           |
|        |     |    |    | Myb_DNA-bind_5  |
|        |     |    |    | Glyco_transf_11 |
|        |     |    |    | RVT_1           |
|        |     |    |    | Ferrochelataase |
|        |     |    |    | TIL             |
|        |     |    |    | Kazal           |
|        |     |    |    | Peptidase_M14   |
|        |     |    |    | zf-CCHC         |
|        |     |    |    | Serpin          |

**Supplementary Table S5.** Number of orthologous genes found in each vertebrate species (out of 1,955). Caecilian species are highlighted in bold type.

|                                           | Class              | Taxon occupancy |
|-------------------------------------------|--------------------|-----------------|
| <b><i>Caecilia tentaculata</i></b>        | <b>Amphibia</b>    | <b>333</b>      |
| <b><i>Microcaecilia dermatophaga</i></b>  | <b>Amphibia</b>    | <b>240</b>      |
| <b><i>Microcaecilia unicolor</i></b>      | <b>Amphibia</b>    | <b>314</b>      |
| <b><i>Rhinatrema bivittatum</i></b>       | <b>Amphibia</b>    | <b>357</b>      |
| <b><i>Typhlonectes compressicauda</i></b> | <b>Amphibia</b>    | <b>304</b>      |
| <i>Xenopus tropicalis</i>                 | Amphibia           | 134             |
| <i>Gallus gallus</i>                      | Aves               | 204             |
| <i>Meleagris gallopavo</i>                | Aves               | 165             |
| <i>Taeniopygia guttata</i>                | Aves               | 215             |
| <i>Petromyzon marinus</i>                 | Cephalaspidomorphi | 83              |
| <i>Latimeria chalumnae</i>                | Coelacanthiformes  | 246             |
| <i>Ailuropoda melanoleuca</i>             | Mammalia           | 536             |
| <i>Bos taurus</i>                         | Mammalia           | 477             |
| <i>Callithrix jacchus</i>                 | Mammalia           | 701             |
| <i>Canis lupus familiaris</i>             | Mammalia           | 520             |
| <i>Cavia porcellus</i>                    | Mammalia           | 426             |
| <i>Dasypus novemcinctus</i>               | Mammalia           | 370             |
| <i>Dipodomys ordii</i>                    | Mammalia           | 387             |
| <i>Echinops telfairi</i>                  | Mammalia           | 421             |
| <i>Equus caballus</i>                     | Mammalia           | 464             |
| <i>Felis catus</i>                        | Mammalia           | 493             |
| <i>Gorilla gorilla</i>                    | Mammalia           | 966             |
| <i>Homo sapiens</i>                       | Mammalia           | 888             |
| <i>Ictidomys tridecemlineatus</i>         | Mammalia           | 430             |
| <i>Loxodonta africana</i>                 | Mammalia           | 448             |
| <i>Macaca mulatta</i>                     | Mammalia           | 648             |
| <i>Macropus eugenii</i>                   | Mammalia           | 248             |
| <i>Microcebus murinus</i>                 | Mammalia           | 553             |
| <i>Monodelphis domestica</i>              | Mammalia           | 318             |
| <i>Mus musculus</i>                       | Mammalia           | 521             |
| <i>Mustela putorius</i>                   | Mammalia           | 422             |
| <i>Myotis lucifugus</i>                   | Mammalia           | 389             |
| <i>Nomascus leucogenys</i>                | Mammalia           | 794             |
| <i>Ornithorhynchus anatinus</i>           | Mammalia           | 299             |
| <i>Oryctolagus cuniculus</i>              | Mammalia           | 448             |
| <i>Otolemur garnettii</i>                 | Mammalia           | 451             |
| <i>Pan troglodytes</i>                    | Mammalia           | 818             |
| <i>Pongo abelii</i>                       | Mammalia           | 876             |
| <i>Procavia capensis</i>                  | Mammalia           | 433             |
| <i>Pteropus vampyrus</i>                  | Mammalia           | 551             |
| <i>Rattus norvegicus</i>                  | Mammalia           | 523             |
| <i>Sarcophilus harrisii</i>               | Mammalia           | 339             |
| <i>Sus scrofa</i>                         | Mammalia           | 462             |
| <i>Tarsius syrichta</i>                   | Mammalia           | 401             |
| <i>Tupaia belangeri</i>                   | Mammalia           | 439             |
| <i>Tursiops truncatus</i>                 | Mammalia           | 545             |
| <i>Anolis carolinensis</i>                | Reptilia           | 185             |
| <i>Pelodiscus sinensis</i>                | Reptilia           | 220             |
| <i>Danio rerio</i>                        | Teleostei          | 341             |
| <i>Gadus morhua</i>                       | Teleostei          | 302             |
| <i>Gasterosteus aculeatus</i>             | Teleostei          | 327             |
| <i>Oreochromis niloticus</i>              | Teleostei          | 272             |
| <i>Oryzias latipes</i>                    | Teleostei          | 280             |
| <i>Takifugu rubripes</i>                  | Teleostei          | 204             |
| <i>Tetraodon nigroviridis</i>             | Teleostei          | 255             |
| <i>Xiphophorus maculatus</i>              | Teleostei          | 346             |

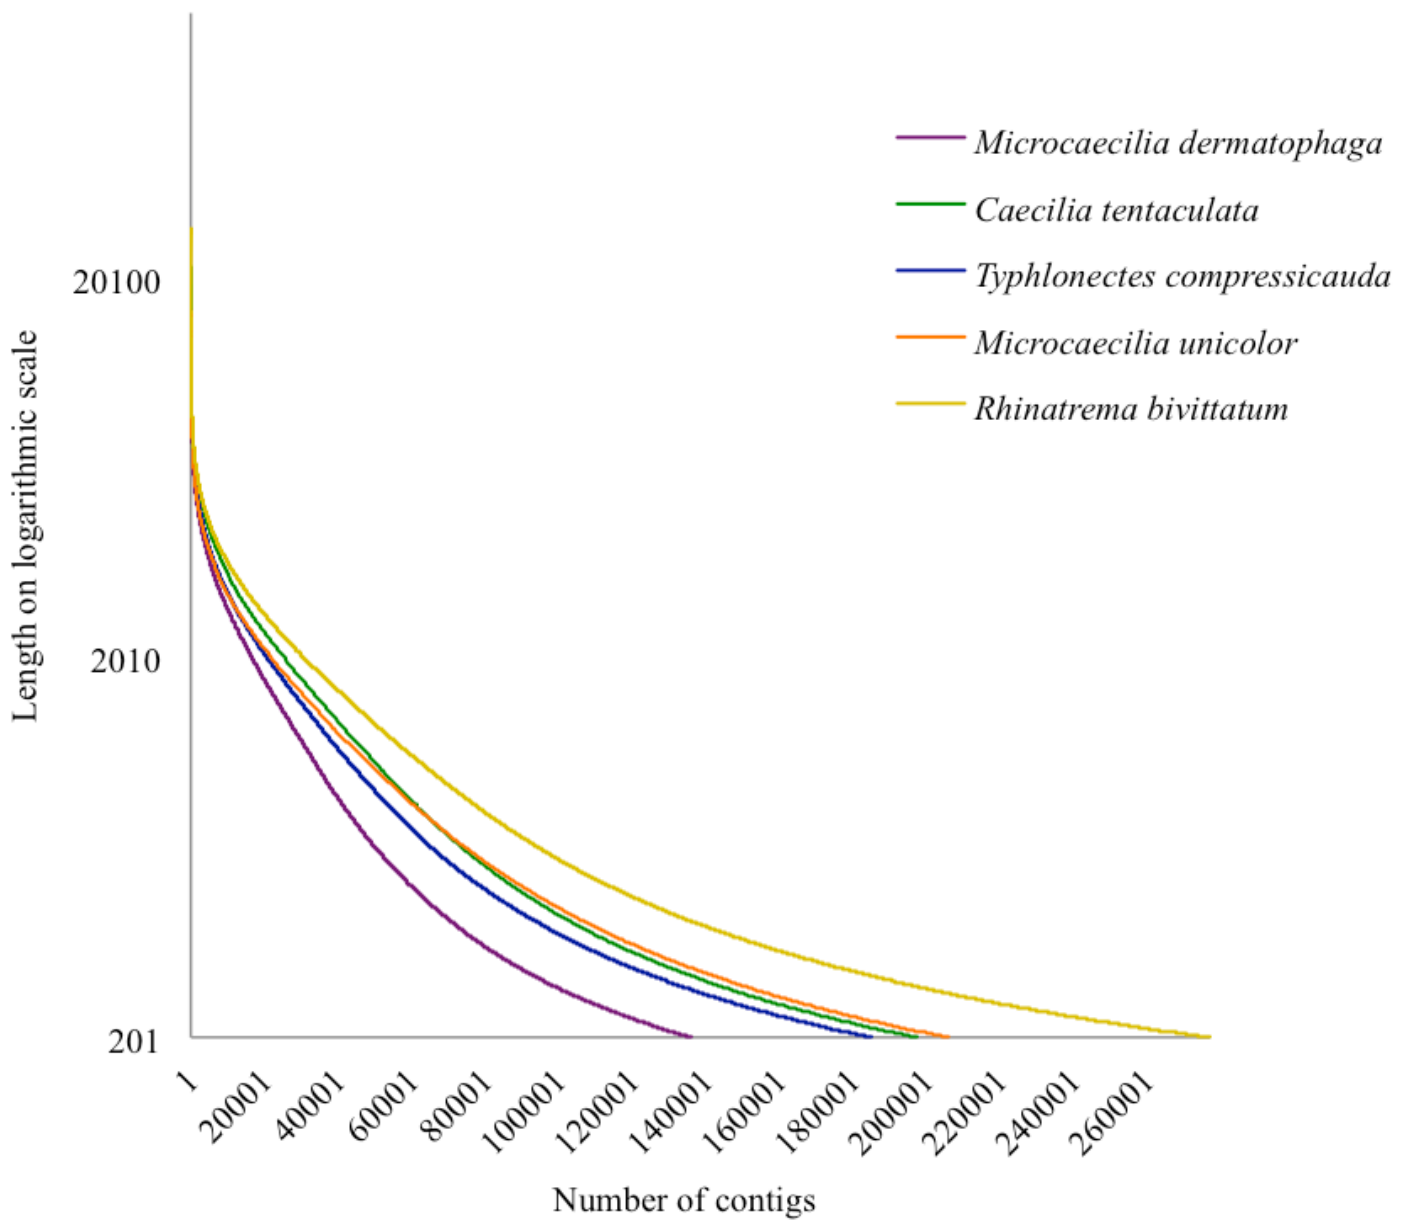

**Supplementary Figure S1.** Contig lengths for the five studied species-specific caecilian transcriptomes.



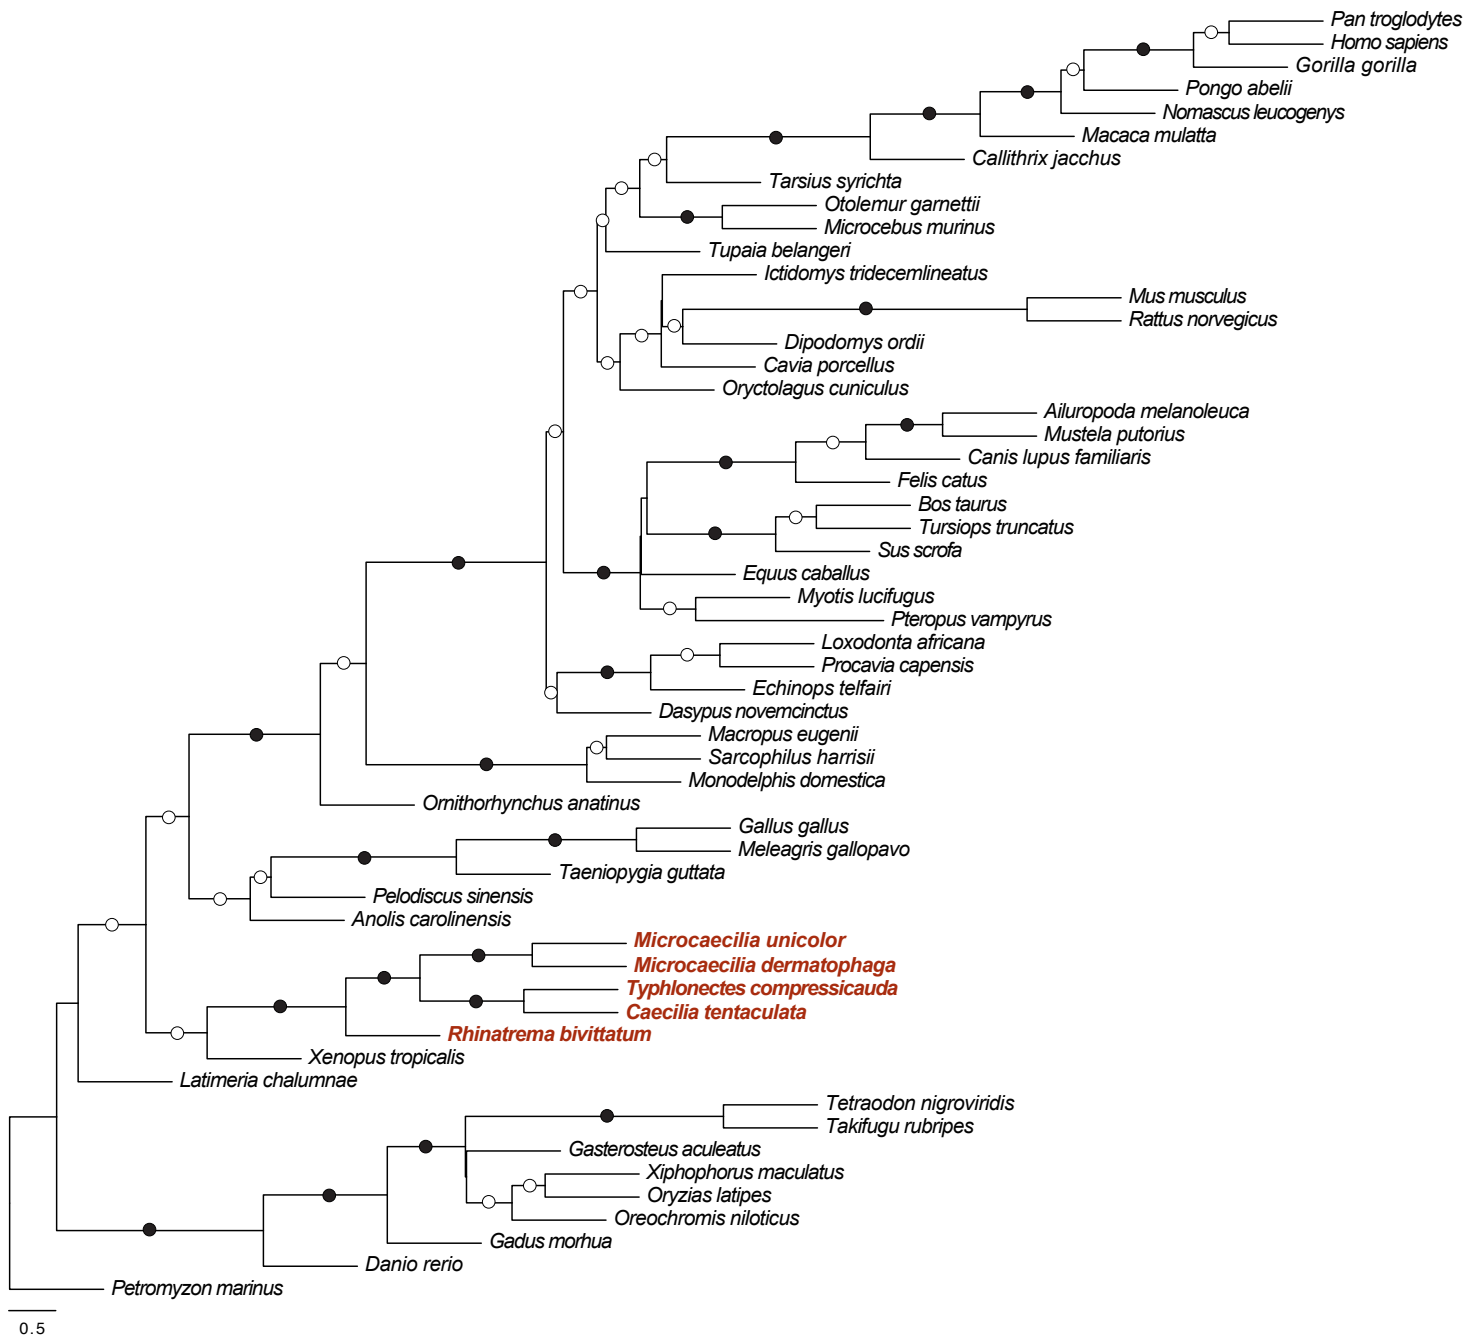

**Supplementary Figure S2.** Supertree of vertebrates reconstructed from 1,955 orthologous gene trees using ASTRAL. Filled bullets on branches denote strong support as measured by both posterior probabilities ( $\geq 0.95$ ) and quartet percentages ( $\geq 70\%$ ) for the respective internal branches. Open bullets denote strong support for posterior probabilities ( $\geq 0.95$ ) but not for quartet percentages ( $< 70\%$ ). Absence of bullet on a branch denotes weak support as measured by both posterior probabilities ( $< 0.95$ ) and quartet percentages ( $< 70\%$ ). Scale bar indicates substitutions per site. The five sampled caecilian species are highlighted.
